# Supplementary material for: Overexpression of a Fragaria vesca NAM, ATAF, and CUC (NAC) Transcription Factor Gene (FvNAC29) Increases Salt and Cold Tolerance in Arabidopsis thaliana
Source: MDPI journal article supplement (doi:10.3390/ijms25074088), 2024-04-06
Supplement: s1 [file s1]

# Supplementary Materials

**Table S1.** List of primers used in this study.

| Primer Name         | PrimerSequence (5'→3')                      | Purpose                            |
|---------------------|---------------------------------------------|------------------------------------|
| <i>FvActin</i> -F   | GCGACAATGGAACTGGAATGG                       | qPCR                               |
| <i>FvActin</i> -R   | GACAATTTCCCGTTCAGCAGTG                      | qPCR                               |
| <i>FvNAC29</i> -qF  | AAGCCAATAGTAGCTCTGGACT                      | qPCR                               |
| <i>FvNAC29</i> -qR  | GTTGTTGTACGCTGGATTAC                        | qPCR                               |
| <i>FvNAC29</i> -F   | ATGGAAGCCAATAGTAGCTC                        | full-length cDNA of <i>FvNAC29</i> |
| <i>FvNAC29</i> -R   | TTAGTGGTTCAAACCATTCATG                      | full-length cDNA of <i>FvNAC29</i> |
| <i>HR</i> -F        | AGAACACGGGGGACGAGCTCATGGAAGCCAATAGTAGCTC    | PCR for homologous recombination   |
| <i>HR</i> -R        | ACCATGGTGTCTGACTCTAGATTAGTGGTTCAAACCATTCATG | PCR for homologous recombination   |
| <i>FvNAC29</i> -slF | GGATCCCCTAGGC AAAAGAGTGAAAG                 | For subcellular localization       |
| <i>FvNAC29</i> -slR | TCACTTATGAAATAGCCATGAAACC                   | For subcellular localization       |
